# Supplementary material for: Robust Assessment of Macromolecular Fraction (MMF) in Muscle with Differing Fat Fraction Using Ultrashort Echo Time (UTE) Magnetization Transfer Modeling with Measured T1
Source: MDPI journal article supplement (doi:10.3390/diagnostics13050876), 2023-02-24
Supplement: s1 [file s1]

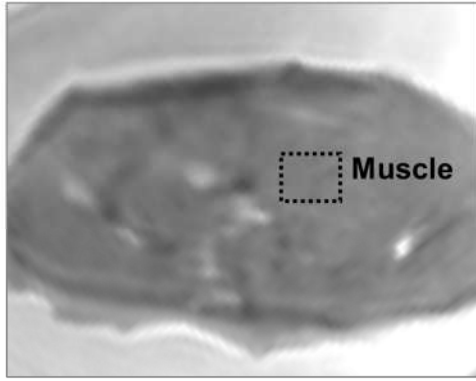

**(A)**

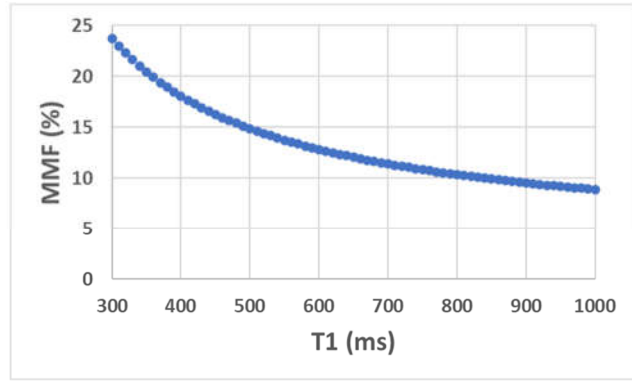

**(B)**

**Figure S1.** (A) T1-weighted UTE MRI image of a bovine muscle specimen embedded in lard. (B) The MMF values of the muscle region (ROI inside of a black box in (A)) using differing T1 values as inputs for two-pool MT modeling. T1 value reduction from 1000 ms to 300 ms resulted in over 100% MMF overestimation for the same ROI in pure muscle.
